# Supplementary material for: Paralytic Shellfish Toxins in Surf Clams Mesodesma donacium during a Large Bloom of Alexandrium catenella Dinoflagellates Associated to an Intense Shellfish Mass Mortality
Source: PubMed Central journal article supplement (PMC6520680; doi:10.3390/toxins11040188), 2019-03-29
Supplement: toxins-11-00188-s001.pdf [file toxins-11-00188-s001.pdf]

## Supplementary Material

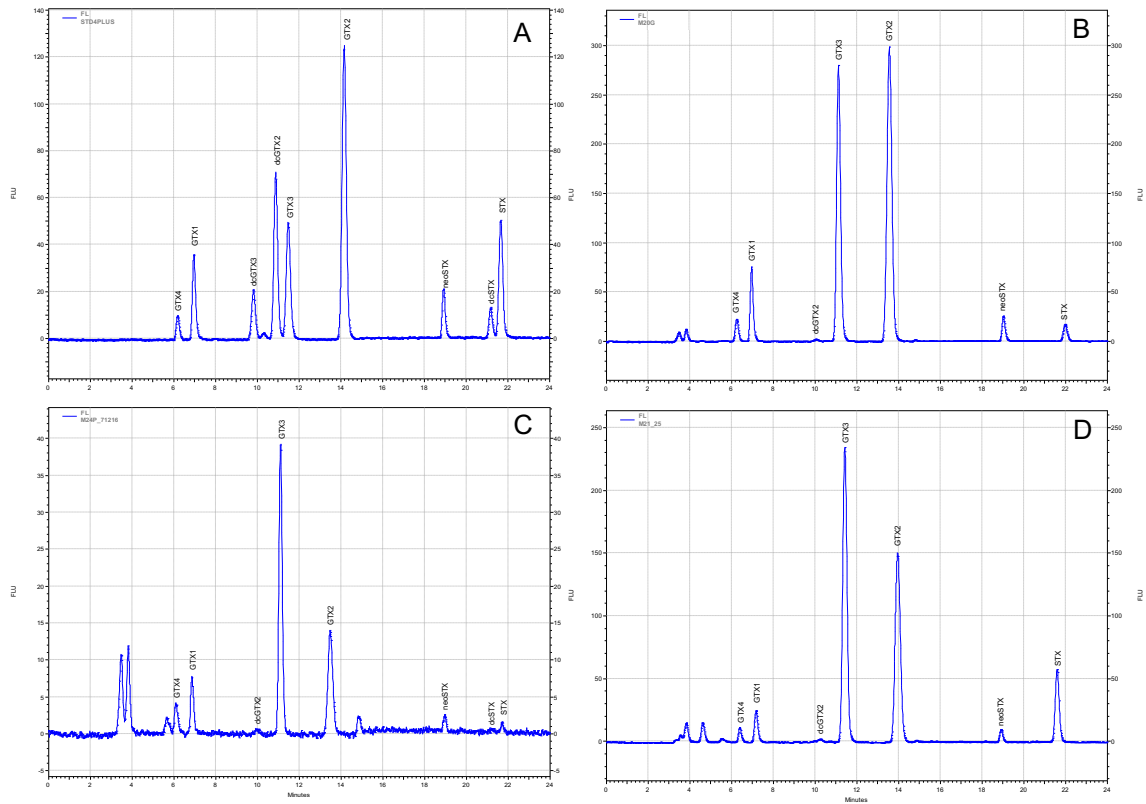

S1. Selected chromatograms of Paralytic Shellfish Toxins (PST) in reference material (A), digestive gland (B), foot (C) and muscle (D).

S2. Limits of detection (LOD) and quantification (LOQ) for each toxin in *Mesodesma donacium*

| TOXIN  | LOD<br>mg STX diHCl kg <sup>-1</sup> | LOQ<br>mg STX diHCl kg <sup>-1</sup> |
|--------|--------------------------------------|--------------------------------------|
| GTX4   | 0.031                                | 0.09                                 |
| GTX1   | 0.055                                | 0.17                                 |
| dcGTX3 | 0.005                                | 0.01                                 |
| dcGTX2 | 0.005                                | 0.02                                 |
| GTX3   | 0.009                                | 0.03                                 |
| GTX2   | 0.003                                | 0.01                                 |
| NEO    | 0.042                                | 0.13                                 |
| dcSTX  | 0.051                                | 0.15                                 |
| STX    | 0.017                                | 0.05                                 |
